# Supplementary material for: Combined Use of Genome-Wide Association Data and Correlation Networks Unravels Key Regulators of Primary Metabolism in Arabidopsis thaliana
Source: PLoS Genet. 2016 Oct 19;12(10):e1006363. doi: 10.1371/journal.pgen.1006363 (PMC5070769; doi:10.1371/journal.pgen.1006363)
Supplement: S2 Table — (XLSX) [file pgen.1006363.s013.xlsx]

## Sheet: GWAS Metabolites
S2 Table Summary of metabolite information including metabolite ID, metabolite name, metabolite class, and mass used for quantification in the genome-wide association study.
Met_ID	Metabolite name	Metabolite Class	quantMass
met01	Maleic acid	Organic Acid	147
met02	Proline	Amino Acid	142
met03	Altrose	Sugar	160
met04	Malic acid	Organic Acid	233
met05	Succinic acid	Organic Acid	147
met06	Sucrose	Sugar	361
met07	Serine	Amino Acid	204
met08	Dehydroascorbic acid	Organic Acid	173
met09	Aspartate	Amino Acid	232
met10	myo-inositol	Sugar	191
met11	Citric acid	Organic Acid	273
met12	Similar to Uridine-5-diphosphoglucose disodium salt	Unknown	217
met13	Unknown01	Unknown	174
met14	Alanine	Amino Acid	116
met15	Unknown02	Unknown	204
met16	Glutamine	Amino Acid	156
met17	Threonine	Amino Acid	117
met18	Glycine	Amino Acid	174
met19	Fructose	Sugar	217
met20	Glucose	Sugar	160
met21	Galactinol	Sugar	204
met22	1,6-Anhydro-beta-D-glucose	Sugar	204
met23	Glutamine [-H2O]	Amino Acid	154
met24	Phosphoric acid	Organic Acid	299
met25	Valine	Amino Acid	144
met26	Unknown03	Unknown	89
met27	Arabinose	Sugar	103
met28	Sinapic acid (cis)	Organic Acid	338
met29	Unknown04	Unknown	147
met30	Glyceric acid	Organic Acid	189
met31	GABA	Amino Acid	174
met32	Phenylalanine	Amino Acid	218
met33	Isopropyl-beta-D-thiogalactoside	Sugar	147
met34	Unknown05 (sugar)	Unknown	147
met35	Unknown06	Unknown	204
met36	Octadecanoic acid	Organic Acid	117
met37	Spermidine	Amine	144
met38	Maltose	Sugar	204
met39	Threonic acid	Organic Acid	292
met40	Fucose	Sugar	117
met41	Citrulline/Arginine	Amino Acid	157
met42	Putrescine	Amine	174
met43	Unknown07	Unknown	204
met44	Asparagine	Amino Acid	116
met45	Cysteine	Amino Acid	100
met46	Sinapic acid (trans)	Organic Acid	338
met47	Isoleucine	Amino Acid	158
met48	Methionine	Amino Acid	128
met49	Leucine	Amino Acid	158
met50	Trehalose	Sugar	191
met51	Unknown08	Unknown	147
met52	Tyrosine	Amino Acid	218
met53	Pyruvic acid	Organic Acid	174
met54	Unknown09	Unknown	234
met55	Gluconic acid	Sugar	292
met56	Mannose	Sugar	160
met57	Unknown10	Unknown	191
met58	Palmitic acid	Organic Acid	313
met59	Unknown11	Unknown	204
met60	Benzoic acid	Organic Acid	105
met61	Tyramine	Amine	174
met62	Unknown12	Unknown	143
met63	2-Oxoglutaric acid	Organic Acid	198
met64	Nicotinic acid	Organic Acid	180
met65	beta-alanine	Amino Acid	174
met66	Unknown13	Unknown	217
met67	Hydroxyproline	Amino Acid	230
met68	Similar to Methanolphosphate	Unknown	241
met69	Tryptophan	Amino Acid	202
met70	Unknown14	Unknown	281
met71	Citramalate	Organic Acid	247
met72	4-hydroxy-benzoic acid	Organic Acid	223
met73	Similar to L-Glutamine	Unknown	190
met74	Unknown15	Unknown	275
met75	Ascorbic acid	Organic Acid	332
met76	Unknown16	Unknown	281
met77	Erythritol	Sugar	217
met78	Adenine	Others	264
met79	Shikimate	Organic Acid	255
met80	Similar to Uric acid	Unknown	441
met81	Homoserine	Amino Acid	128
met82	Unknown17	Unknown	91
met83	Glucose-6-phosphate	Sugar	387
met84	Butanoic acid, 2-amino-	Organic Acid	130
met85	Eicosanoic acid methyl ester	others	326
met86	Octacosanoic acid	Organic Acid	117
met87	Glycerol-3-phosphate	Others	299
met88	Galactose, 3,6-anhydro-	Sugar	129
met89	Histidine	Amino Acid	154
met90	Fumaric acid	Organic Acid	245
met91	Glutamate	Amino Acid	246
met92	Glycerol	Others	117
met93	Lysine	Amino Acid	156
met94	Ornithine	Amino Acid	142
